# Supplementary material for: Chemical-Functional Diversity in Cell-Penetrating Peptides
Source: PubMed Central journal article supplement (PMC3739727; doi:10.1371/journal.pone.0071752), 2013-08-09
Supplement: pone.0071752.s001.pdf [file pone.0071752.s001.pdf]

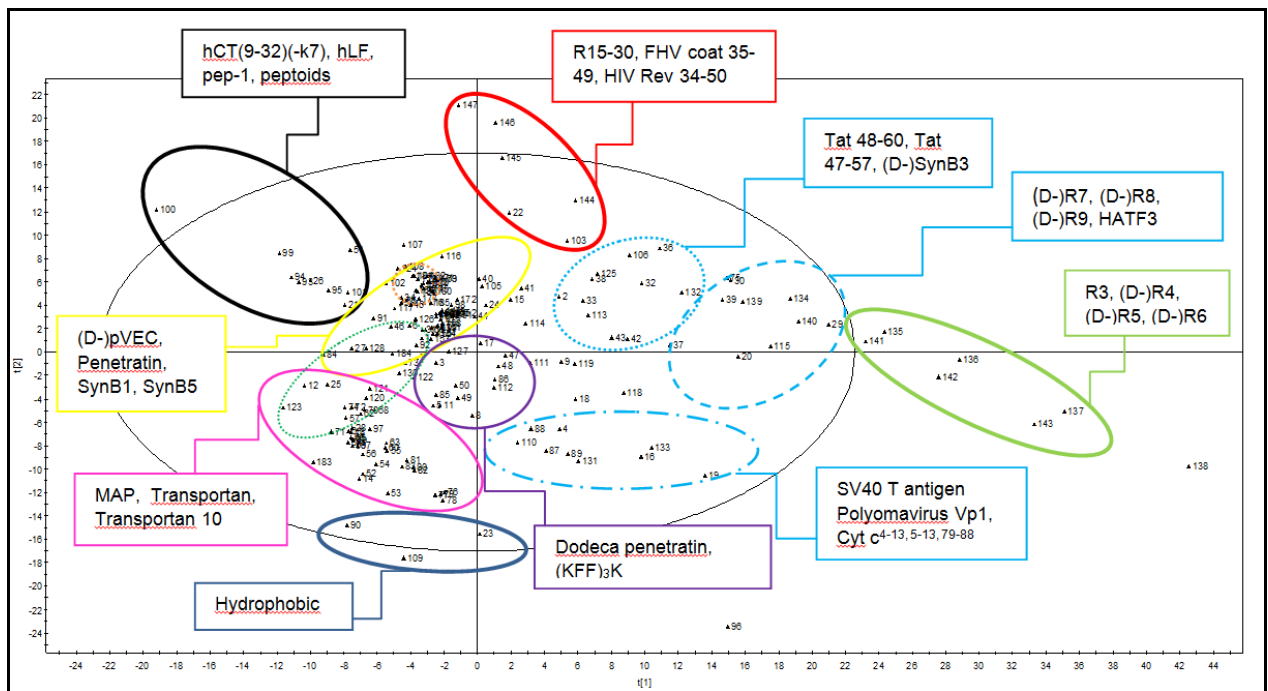

**Figure S1. Score plot of the first versus the second principal component of the PCA-analysis of 186 peptides after dividing their descriptors by the molecular weight.**

The colors of the clusters correspond with the clusters found in the score plot of the PCA-analysis using the original descriptors (Figure 2). For each cluster, some examples of peptides are indicated.
