# Supplementary material for: Chemical-Functional Diversity in Cell-Penetrating Peptides
Source: PubMed Central journal article supplement (PMC3739727; doi:10.1371/journal.pone.0071752), 2013-08-09
Supplement: pone.0071752.s002.pdf [file pone.0071752.s002.pdf]

**Table S1. Overview of the 186 (non-) CPPs, including their CP-response.**

| Peptide ID | Peptide name                 | Sequence                                | Number of AA | CP-response | Ref.                       |
|------------|------------------------------|-----------------------------------------|--------------|-------------|----------------------------|
| 1          | pVEC                         | LLIILRRRIRKQAHHSK                       | 18           | 1.318       | 17, 25, 27, 53, 66         |
| 2          | Tat 48-60                    | GRKKRRQRRRPPQ                           | 13           | 0.221       | 17, 26, 34, 38, 66         |
| 3          | APH-1 (85-98)                | VFRFAYYKLLKKA                           | 13           | 0.188       | 26                         |
| 4          | APH-1 (236-246)              | LRSIQRSLCK                              | 11           | 0.039       | 26                         |
| 5          | Nicastrin (38-53)            | RKIYIPLNKTAPCVR                         | 15           | 0.345       | 26                         |
| 6          | Nicastrin (414-434)          | RRPNQSQPLPSSLRFLRAR                     | 21           | 0.016       | 26                         |
| 7          | Nicastrin (616-635)          | RLPRCVRSTARLARALSPAF                    | 20           | 0.031       | 26                         |
| 8          | Presenilin-1 (97-109)        | VATIKSVSFYTRK                           | 13           | 0.008       | 26                         |
| 9          | Presenilin-1 (305-317)       | AQRRVSKNSKYNA                           | 13           | 0.016       | 26                         |
| 10         | D-pVEC                       | llilrrrirkqahahsk                       | 18           | 0.824       | 7, 27, 53                  |
| 11         | (KFF) <sub>3</sub> K         | KFFKFFKFFK                              | 10           | 1.837       | 27                         |
| 12         | Transportan                  | GWTLNSAGYLLGKINLKALAALAKKIL             | 27           | (4.357)     | 17, 28, 68                 |
| 13         | Transportan 10               | AGYLLGKINLKALAALAKKIL                   | 21           | 1.641       | 28, 30, 32, 34, 66         |
| 14         | MAP                          | KLALKLALKALKAALKLA                      | 18           | 1.716       | 13, 17, 29, 37, 53         |
| 15         | Syn B1                       | RGGRLSYSRRRFSTSTGR                      | 18           | 0.063       | 17, 39                     |
| 16         | Polyomavirus Vp <sub>1</sub> | APKRKSGVSK                              | 10           | 0.028       | 17                         |
| 17         | Bac1-15                      | RRIRPRPRLPRPRP                          | 15           | 0.035       | 17                         |
| 18         | NF-κB                        | VQRKRQKLMP                              | 10           | 0.025       | 17                         |
| 19         | SV40-T antigen               | PKKKRKV                                 | 7            | 0.028       | 17                         |
| 20         | HATF <sub>3</sub>            | ERKKRRRE                                | 8            | 0.023       | 17                         |
| 21         | hCT(9-32)                    | LGTYTQDFNKFHTFPQTAIGVGAP                | 24           | 0.024       | 17                         |
| 22         | HIV-1 Rev (34-50)            | TRQARRNRRRRWRERQR                       | 17           | 1.460       | 17, 38, 56                 |
| 23         | Integrin                     | VTVLALGALAGVGVG                         | 15           | 0.549       | 17                         |
| 24         | DPV6                         | GRPRESGKKRKRRLKP                        | 17           | 0.073       | 17                         |
| 25         | S4 <sub>13</sub> PV          | ALWKTLLKKVLKAPKKRKRK                    | 20           | 0.781       | 17                         |
| 26         | Pep-1                        | KETWWETWWTEWSQPKKKRKRK                  | 21           | 0.105       | 17                         |
| 27         | MPG                          | GALFLGWLGAAGSTMGAWSQPKKKRKRK            | 27           | 1.065       | 17                         |
| 28         | Poly-P (SAP)                 | VRLPPVLRPPPVLRRPPP                      | 18           | 0.027       | 17                         |
| 29         | R7                           | RRRRRRR                                 | 7            | 0.395       | 12, 16, 17, 36             |
| 30         | R9                           | RRRRRRRRR                               | 9            | 1.000       | 17, 31, 33, 41, 42, 47, 63 |
| 31         | pVEC scrambled               | IAARIKLSRQHIKLRHL                       | 18           | 0.101       | 7, 17                      |
| 32         | Tat 47-57                    | YGRKKRRQRRR                             | 11           | 0.309       | 30, 33, 42, 58             |
| 33         | Tat 48-59                    | GRKKRRQRRRPP                            | 12           | 0.192       | 31, 63                     |
| 34         | M918                         | MVTVLFRRLRIRACGPPRVV                    | 22           | (7.158)     | 32                         |
| 35         | Penetratin                   | RQIKIWFQNRMMKWKK                        | 16           | 1.000       | 33, 39, 44                 |
| 36         | R11                          | RRRRRRRRRR                              | 11           | 0.211       | 34                         |
| 37         | RL9                          | RRLRLRLR                                | 9            | 0.134       | 35                         |
| 38         | RW9                          | RRWRRWR                                 | 9            | 1.301       | 35                         |
| 39         | R7W                          | RRRRRRRW                                | 8            | 1.687       | 36                         |
| 40         | VP22                         | NAKTRRHERRRKLAIER                       | 17           | 0.161       | 38                         |
| 41         | D-Syn B1                     | rggrlsysrrrfststgr                      | 18           | 0.089       | 39                         |
| 42         | Syn B3                       | RRLSYSRRRF                              | 10           | 0.126       | 39                         |
| 43         | D-Syn B3                     | rrlsysrrrf                              | 10           | 0.185       | 39                         |
| 44         | Syn B5                       | RGGRLAYLRRRWAVLGR                       | 17           | 1.159       | 39                         |
| 45         | ARF (1-22)                   | MVRRFLVTLRIRACGPPRVV                    | 22           | 1.641       | 40                         |
| 46         | ARF (1-22) scrambled         | FVTRGCPRLVRLIRVMVPRR                    | 22           | 1.296       | 40                         |
| 47         | ARF (2-14)                   | VRRFLVTLRIRRA                           | 13           | 0.950       | 40                         |
| 48         | ARF (2-14) scrambled         | RVRILARFLRTRV                           | 13           | 0.173       | 40                         |
| 49         | ARF (19-31)                  | RVRVFVHIPRLT                            | 13           | 1.382       | 40                         |
| 50         | ARF (19-31) scrambled        | VIRVHFRLPVRTV                           | 13           | 0.259       | 40                         |
| 51         | hLF                          | KCFQWQRNMRKVRGPPVSCIQR (disulfide 2-19) | 22           | 0.952       | 41                         |
| 52         | MAP (II)                     | KALAALLKLLAKLLAALK                      | 18           | 0.181       | 13                         |
| 53         | MAP (III)                    | KLALKLALKALKAALK                        | 16           | 0.115       | 13                         |
| 54         | MAP (VII)                    | KLALKLALKALQAALQLA                      | 18           | 0.022       | 13                         |
| 55         | MAP (VIII)                   | KLALQLALQALQAALQLA                      | 18           | 0.243       | 13                         |

|     |                                                  |                                                          |    |           |        |
|-----|--------------------------------------------------|----------------------------------------------------------|----|-----------|--------|
| 56  | MAP (XI)                                         | LKTLATALTKLAKLTTL                                        | 18 | 0.177     | 13     |
| 57  | MAP (XIII)                                       | LKTLTETLKELTTEL                                          | 18 | 0.052     | 13     |
| 58  | MAP (XV)                                         | RQKIWFQNRMRKWK                                           | 16 | 0.104     | 13     |
| 59  | KLA 1                                            | KLALKLALKAWKAAKLA                                        | 18 | 0.085     | 13     |
| 60  | KLA 2                                            | KLALKAALKAWKAAKLA                                        | 18 | 0.008     | 13     |
| 61  | KLA 11                                           | KITLKLAIKAWKLALKAA                                       | 18 | 0.025     | 13     |
| 62  | KLA 5                                            | KIAAKSIKIWSILKIA                                         | 18 | 0.036     | 13     |
| 63  | KLA 12                                           | KALAKALAKLWKALAKAA                                       | 18 | 0.079     | 13     |
| 64  | KLA 13                                           | KLALKLALKWAKLALKAA                                       | 18 | 0.008     | 13     |
| 65  | KLA 14                                           | KLLAKAARKWLLALKAA                                        | 18 | 0.015     | 13     |
| 66  | KLA 9                                            | KLLAKAALKWLLKALKAA                                       | 18 | 0.023     | 13     |
| 67  | KLA 10                                           | KALKKLLAKWLAALKALL                                       | 18 | 0.115     | 13     |
| 68  | KLA 15                                           | KLAAALLKKWKKLAAALL                                       | 18 | 0.120     | 13     |
| 69  | KLA 8                                            | KALAALLKKWAKLLAALK                                       | 18 | 0.181     | 13     |
| 70  | TP10-1                                           | AGYLLGPNLAKALAALAKKIL                                    | 21 | 1.223     | 11     |
| 71  | TP10-2                                           | AGYLLGKINLPLAALAKKIL                                     | 21 | 0.749     | 11     |
| 72  | TP10-3                                           | AAYLLAKINLAKALAALAKKIL                                   | 21 | 1.243     | 11     |
| 73  | TP10-4                                           | AGYLLGKINLRALAALARRIL                                    | 21 | 1.263     | 11     |
| 74  | TP10-5                                           | AGYLLGKINLKKLAKL(Aib)KKIL <sup>1</sup>                   | 21 | 2.141     | 11     |
| 75  | D-R9                                             | rrrrrrrr                                                 | 9  | 1.389     | 12, 43 |
| 76  | MP                                               | INLKALAALAKKIL                                           | 14 | 0.570     | 45     |
| 77  | iMP                                              | inlkalaalakkil                                           | 14 | (3.602)   | 45     |
| 78  | rMP                                              | LIKKALAALAKLNI                                           | 14 | 0.352     | 45     |
| 79  | riMP                                             | likkalaalaklni                                           | 14 | 0.288     | 45     |
| 80  | MitP                                             | INLKKLAKL(Aib)KKIL <sup>1</sup>                          | 14 | 2.712     | 45, 46 |
| 81  | iMitP                                            | inlkklakl(Aib)kkil                                       | 14 | 2.272     | 45     |
| 82  | rMitP                                            | LIKK(Aib)LKALKKLNi                                       | 14 | 0.531     | 45     |
| 83  | riMitP                                           | likk(Aib)lkalkklni <sup>1</sup>                          | 14 | 0.837     | 45     |
| 84  | Cyt c <sup>77-101</sup>                          | GTKMIFVGIKKKEERADLIAYLKKA                                | 25 | 0.179     | 46     |
| 85  | Cyt c <sup>86-101</sup>                          | KKKEERADLIAYLKKA                                         | 16 | 0.006     | 46     |
| 86  | Cyt c <sup>79-92</sup>                           | KMIFVGIKKKEERA                                           | 14 | 0.013     | 46     |
| 87  | Cyt c <sup>79-88</sup>                           | KMIFVGIKKK                                               | 10 | 0.006     | 46     |
| 88  | Cyt c <sup>4-13</sup>                            | EKGKKIFIMK                                               | 10 | 0.013     | 46     |
| 89  | Cyt c <sup>5-13</sup>                            | KGKKIFIMK                                                | 9  | 0.069     | 46     |
| 90  | MTS                                              | AAVALLPAVLLALLAP                                         | 16 | 0.315     | 48     |
| 91  | P14LRR                                           | see fig. 1 reference 49                                  | -  | (7.958)   | 49     |
| 92  | P11LRR                                           | see fig. 1 reference 49                                  | -  | 1.623     | 49, 50 |
| 93  | (P10LRR-Gly) <sub>2</sub> -C5                    | see fig. 2 reference 50                                  | -  | (84.034)  | 50     |
| 94  | (P10LRR-β-Ala) <sub>2</sub> -C5                  | see fig. 2 reference 50                                  | -  | (66.648)  | 50     |
| 95  | (P10LRR-ABUA) <sub>2</sub> -C5                   | see fig. 2 reference 50                                  | -  | (73.892)  | 50     |
| 96  | VPTLK                                            | VPTLK                                                    | 5  | 0.002     | 51     |
| 97  | MAP(Aib)                                         | KL(Aib)LKL(Aib)LK(Aib)LKA(Aib)LKL(Aib) <sup>1</sup>      | 18 | (125.240) | 52     |
| 98  | sC18                                             | GLRKRLRKFRNKIKEK                                         | 16 | 0.166     | 54     |
| 99  | hCT(18-32)-k7                                    | KKFKHTFPQTAIGVGAP<br>KKRKAPKKKRKFA <sup>1</sup>          | 28 | 0.183     | 54, 57 |
| 100 | N-E5L-hCT(18-32)-k7                              | GLLEALAELEKFKHTFPQTAIGVGAP<br>KKRKAPKKKRKFA <sup>1</sup> | 39 | 0.364     | 54     |
| 101 | N-E5L-sC18                                       | GLLEALAELEGLRKRLRKFRNKIKEK                               | 27 | 0.150     | 54     |
| 102 | N-E5L-Tat 48-60                                  | GLLEALAELEGRKKRRQRRPPQ                                   | 24 | 0.507     | 54     |
| 103 | FHV coat (35-49)                                 | RRRRNRTRRRRRVR                                           | 15 | (4.127)   | 56     |
| 104 | PasTat                                           | FFLIPKGGRRRRQRRPPQ                                       | 20 | (4.426)   | 55     |
| 105 | BMV Gag (7-25)                                   | KMTRAQRRAAARRNRWTAR                                      | 19 | 0.288     | 56     |
| 106 | HTLV-II Rex (4-16)                               | TRRQTRRRARRNR                                            | 13 | 0.288     | 56     |
| 107 | Human cJun (252-279)                             | RIKAERKMRNRRIAASKSRKRKLERIAR                             | 28 | 2.744     | 56     |
| 108 | Human cFos (139-164)                             | KRRIRRRNKMAAAKSRNRRLTDT                                  | 26 | 0.199     | 56     |
| 109 | K-FGF<br>(Kaposi fibroblast growth factor)       | AAVLLPVLLAAP                                             | 12 | 0.200     | 58     |
| 110 | PreS2-TLM<br>(PreS2-derived translocatory motif) | PLSSIFSRIGDP                                             | 12 | 0.224     | 58     |
| 111 | PTD4<br>(Protein transduction domain 4)          | PIRRRKKLRLK                                              | 12 | 0.658     | 58     |
| 112 | α-peptide/β-peptoid chimera 2                    | see fig. 1 reference 59                                  | -  | 0.185     | 59     |
| 113 | α-peptide/β-peptoid chimera 6                    | see fig. 1 reference 59                                  | -  | 2.040     | 59     |
| 114 | α-peptide/β-peptoid chimera 8                    | see fig. 1 reference 59                                  | -  | 2.102     | 59     |
| 115 | hArg <sub>8</sub> (Homoarginine <sub>8</sub> )   | see fig. 1 reference 59                                  | -  | 0.464     | 59     |
| 116 | PenArg                                           | RQIRIWFQNRMRWR                                           | 16 | 1.810     | 60     |
| 117 | PenLys                                           | KQIKIWFQNKMKWK                                           | 16 | 0.041     | 60     |

|     |                                                                       |                                                                                    |    |         |        |
|-----|-----------------------------------------------------------------------|------------------------------------------------------------------------------------|----|---------|--------|
| 118 | aca-[Lys(Nys <sup>+</sup> )-aca] <sub>4</sub> -Lys(Nys <sup>+</sup> ) | aca-[Lys(Nys <sup>+</sup> )-aca] <sub>4</sub> -Lys(Nys <sup>+</sup> ) <sup>2</sup> | -  | 0.001   | 61     |
| 119 | aca-[Lys(Nys <sup>+</sup> )-aca] <sub>6</sub> -Lys(Nys <sup>+</sup> ) | aca-[Lys(Nys <sup>+</sup> )-aca] <sub>6</sub> -Lys(Nys <sup>+</sup> ) <sup>2</sup> | -  | 0.005   | 61     |
| 120 | M511                                                                  | FLGKKFKKYFLQLLK                                                                    | 15 | 0.599   | 62     |
| 121 | M551                                                                  | KGKFLYLKLFKFL                                                                      | 15 | 0.240   | 62     |
| 122 | G53-1                                                                 | IVIAKLANLMCKTCRLAK                                                                 | 19 | 0.150   | 62     |
| 123 | G53-2                                                                 | AIGVNYLVKFIKVIKIAKLA                                                               | 23 | 0.839   | 62     |
| 124 | <i>Kno ref. 63</i><br><i>(Knotted-1 homeodomain third helix)</i>      | <i>KQIKINWFIQRRHWK</i>                                                             | 18 | (7.358) | 63     |
| 125 | R6/W3                                                                 | RRWWRWR                                                                            | 9  | 0.910   | 63     |
| 126 | Phe <sup>6,14</sup> -penetratin                                       | RQKIFFQNRMMKFKK                                                                    | 16 | 0.727   | 64     |
| 127 | Dodeca-penetratin                                                     | RQKIWFQNRMMKFKK                                                                    | 12 | 1.154   | 64     |
| 128 | MG2d (Magainin 2 analogue)                                            | GIGKFLHSAKKWKAFVGGQIMNC                                                            | 23 | 0.798   | 65     |
| 129 | BF2d (Buforin 2 analogue)                                             | TRSSRAGLQWPVGRVHRLLRKGGC                                                           | 24 | 0.953   | 65     |
| 130 | YTA2                                                                  | YTAIAWVKAFIRKLRK                                                                   | 16 | 1.545   | 66     |
| 131 | K9                                                                    | KKKKKKKKK                                                                          | 9  | 0.119   | 12     |
| 132 | H9                                                                    | HHHHHHHHH                                                                          | 9  | 0.068   | 12     |
| 133 | O9                                                                    | OOOOOOOOO                                                                          | 9  | 0.068   | 12     |
| 134 | R8                                                                    | RRRRRRRR                                                                           | 8  | 0.639   | 12, 16 |
| 135 | R6                                                                    | RRRRRR                                                                             | 6  | 0.194   | 12, 16 |
| 136 | R5                                                                    | RRRRR                                                                              | 5  | 0.077   | 12, 16 |
| 137 | R4                                                                    | RRRR                                                                               | 4  | 0.074   | 12     |
| 138 | R3                                                                    | RRR                                                                                | 3  | 0.055   | 12     |
| 139 | D-R8                                                                  | rrrrrrrr                                                                           | 8  | 1.577   | 12     |
| 140 | D-R7                                                                  | rrrrrr                                                                             | 7  | 1.071   | 12     |
| 141 | D-R6                                                                  | rrrrr                                                                              | 6  | 0.323   | 12     |
| 142 | D-R5                                                                  | rrrr                                                                               | 5  | 0.115   | 12     |
| 143 | D-R4                                                                  | rrrr                                                                               | 4  | 0.098   | 12     |
| 144 | R15                                                                   | RRRRRRRRRRRRRR                                                                     | 15 | 1.345   | 12     |
| 145 | R20                                                                   | RRRRRRRRRRRRRRRRRR                                                                 | 20 | 0.764   | 12     |
| 146 | R25                                                                   | RRRRRRRRRRRRRRRRRRRRRR                                                             | 25 | 0.400   | 12     |
| 147 | R30                                                                   | RRRRRRRRRRRRRRRRRRRRRRRR                                                           | 30 | 0.109   | 12     |
| 148 | [Ala <sub>1</sub> ]pVEC                                               | ALIILRRRIRKQAHAHSK                                                                 | 18 | 0.304   | 7      |
| 149 | [Ala <sub>2</sub> ]pVEC                                               | LAILRRRIRKQAHAHSK                                                                  | 18 | 0.507   | 7      |
| 150 | [Ala <sub>3</sub> ]pVEC                                               | LLAILRRRIRKQAHAHSK                                                                 | 18 | 0.406   | 7      |
| 151 | [Ala <sub>4</sub> ]pVEC                                               | LLIALRRRIRKQAHAHSK                                                                 | 18 | 0.659   | 7      |
| 152 | [Ala <sub>5</sub> ]pVEC                                               | LLIARRRIRKQAHAHSK                                                                  | 18 | 0.456   | 7      |
| 153 | [Ala <sub>6</sub> ]pVEC                                               | LLIILARRIRKQAHAHSK                                                                 | 18 | 2.433   | 7      |
| 154 | [Ala <sub>7</sub> ]pVEC                                               | LLIILRARIRKQAHAHSK                                                                 | 18 | 1.115   | 7      |
| 155 | [Ala <sub>8</sub> ]pVEC                                               | LLIILRRAIRKQAHAHSK                                                                 | 18 | 2.129   | 7      |
| 156 | [Ala <sub>9</sub> ]pVEC                                               | LLIILRRRARKQAHAHSK                                                                 | 18 | 0.760   | 7      |
| 157 | [Ala <sub>10</sub> ]pVEC                                              | LLIILRRRIAKQAHAHSK                                                                 | 18 | 1.470   | 7      |
| 158 | [Ala <sub>11</sub> ]pVEC                                              | LLIILRRRIRAKQAHAHSK                                                                | 18 | 1.774   | 7      |
| 159 | [Ala <sub>12</sub> ]pVEC                                              | LLIILRRRIRKAAAHASK                                                                 | 18 | 1.420   | 7      |
| 160 | [D-Ala <sub>13</sub> ]pVEC                                            | LLIILRRRIRKQAAHASK                                                                 | 18 | 1.825   | 7      |
| 161 | [Ala <sub>14</sub> ]pVEC                                              | LLIILRRRIRKQAAAHASK                                                                | 18 | 0.558   | 7      |
| 162 | [D-Ala <sub>15</sub> ]pVEC                                            | LLIILRRRIRKQAAHASK                                                                 | 18 | 1.115   | 7      |
| 163 | [Ala <sub>16</sub> ]pVEC                                              | LLIILRRRIRKQAAHASK                                                                 | 18 | 1.521   | 7      |
| 164 | [Ala <sub>17</sub> ]pVEC                                              | LLIILRRRIRKQAAHAAK                                                                 | 18 | 2.129   | 7      |
| 165 | [Ala <sub>18</sub> ]pVEC                                              | LLIILRRRIRKQAAHASK                                                                 | 18 | 2.079   | 7      |
| 166 | retro-pVEC                                                            | KSHAHQKRIRRLILL                                                                    | 18 | 0.406   | 7      |
| 167 | Ap1                                                                   | AQIKIWFQNRMMKWKK                                                                   | 16 | 0.289   | 9      |
| 168 | Ap2                                                                   | RAIKIWFQNRMMKWKK                                                                   | 16 | 1.333   | 9      |
| 169 | Ap3                                                                   | RQAKIWFQNRMMKWKK                                                                   | 16 | 0.111   | 9      |
| 170 | Ap4                                                                   | RQAIWFQNRMMKWKK                                                                    | 16 | 0.511   | 9      |
| 171 | Ap5                                                                   | RQIKAWFQNRMMKWKK                                                                   | 16 | 0.244   | 9      |
| 172 | Ap6                                                                   | RQIKIAFQNRMMKWKK                                                                   | 16 | 0.222   | 9      |
| 173 | Ap7                                                                   | RQIKIWAQNRMMKWKK                                                                   | 16 | 0.089   | 9      |
| 174 | Ap8                                                                   | RQIKIWFANRRMMKWKK                                                                  | 16 | 0.778   | 9      |
| 175 | Ap9                                                                   | RQIKIWFQARRMMKWKK                                                                  | 16 | 0.978   | 9      |
| 176 | Ap10                                                                  | RQIKIWFQNRMMKWKK                                                                   | 16 | 0.400   | 9      |
| 177 | Ap11                                                                  | RQIKIWFQNRMMKWKK                                                                   | 16 | 0.242   | 9      |
| 178 | Ap12                                                                  | RQIKIWFQNRRAKWKK                                                                   | 16 | 0.644   | 9      |
| 179 | Ap13                                                                  | RQIKIWFQNRMMAWKK                                                                   | 16 | 0.378   | 9      |
| 180 | Ap14                                                                  | RQIKIWFQNRMMKAKK                                                                   | 16 | 0.356   | 9      |
| 181 | Ap15                                                                  | RQIKIWFQNRMMKWKK                                                                   | 16 | 0.411   | 9      |
| 182 | Ap16                                                                  | RQIKIWFQNRMMKWKKA                                                                  | 16 | 0.444   | 9      |
| 183 | SAP (E)                                                               | VELPPPVELPPPVELPPP                                                                 | 18 | 0.007   | 67     |

|            |                                                                  |                         |           |                 |           |
|------------|------------------------------------------------------------------|-------------------------|-----------|-----------------|-----------|
| 184        | Eng<br>(Engrailed-2 homeodomain third helix)                     | SQIKIWFQNKRAKIKK        | 16        | 1.235           | 69        |
| 185        | Hox<br>(HoxA-13 homeodomain third helix)                         | RQVTIWFQNRrvKEKK        | 16        | 0.500           | 69        |
| <i>186</i> | <i>Kno ref. 69</i><br><i>(Knotted-1 homeodomain third helix)</i> | <i>KQINNWFINQRKRHWK</i> | <i>16</i> | <i>(11.118)</i> | <i>69</i> |

*Peptides whose unified response is an outlier are indicated in italic. Their unreliable CP-responses were not considered during data-evaluation.*

<sup>1</sup>Aib = alpha amino-isobutyric acid

<sup>2</sup>Aca = NH<sub>2</sub>(CH<sub>2</sub>)<sub>5</sub>CO-; Lys(Nys<sup>+</sup>) = Redox amino acid = Lys with 1,4-dihydrotriognelline side chain
