# Supplementary material for: Chemical-Functional Diversity in Cell-Penetrating Peptides
Source: PubMed Central journal article supplement (PMC3739727; doi:10.1371/journal.pone.0071752), 2013-08-09
Supplement: pone.0071752.s003.pdf [file pone.0071752.s003.pdf]

**Table S2. List of cell-penetrating peptides whose CP-response is an outlier.**

| Peptide ID | Peptide Name                    | Reference | Details                                                                                                                                                                          |
|------------|---------------------------------|-----------|----------------------------------------------------------------------------------------------------------------------------------------------------------------------------------|
| 12         | Transportan                     | 17        | In reference 17, transportan showed higher cell-specificity for HeLa cells, resulting in a higher response for cellular influx in comparison with other results for transportan. |
| 34         | M918                            | 32        | In the quantitative uptake assay, M918 showed a 7 times higher influx than penetratin.                                                                                           |
| 91         | P14LRR                          | 49        | P14LRR showed an about 20 times higher uptake than Tat 47-57, the positive control.                                                                                              |
| 93         | (P10LRR-Gly) <sub>2</sub> -C5   | 50        | The dimeric cationic amphiphilic polyproline helices showed an about 200 times higher uptake responses than the positive control Tat 47-57.                                      |
| 94         | (P10LRR-β-Ala) <sub>2</sub> -C5 | 50        |                                                                                                                                                                                  |
| 95         | (P10LRR-ABUA) <sub>2</sub> -C5  | 50        |                                                                                                                                                                                  |
| 97         | MAP(Aib)                        | 52        | The internal positive control MAP showed a much lower influx response in the tested A549 cells ( <i>cfr.</i> cell-specificity)                                                   |
| 103        | FHV Coat (35-49)                | 56        | FHV coat (35-49) showed a 21 times higher cellular uptake than the positive control Tat 48-60.                                                                                   |
| 104        | PasTat                          | 55        | PasTat has a 20 times higher uptake than the positive control Tat.                                                                                                               |
| 124        | Kno ( <i>ref 63</i> )           | 63        | Kno has a 7 times higher uptake than the positive control penetratin.                                                                                                            |
| 186        | Kno ( <i>ref 69</i> )           | 69        | Kno has a 10 times higher uptake than the positive control penetratin.                                                                                                           |
