# Supplementary material for: Chemical-Functional Diversity in Cell-Penetrating Peptides
Source: PubMed Central journal article supplement (PMC3739727; doi:10.1371/journal.pone.0071752), 2013-08-09
Supplement: pone.0071752.s004.pdf [file pone.0071752.s004.pdf]

**Table S3. Classification of (non-) CPPs based on chemical class, literature data and their uptake mechanisms.**

| Peptide ID | Peptide name                 | Chemical class <sup>1</sup> | CP-response | Ref. | Literature evaluation <sup>2</sup> | Comment                                         | Uptake mechanism <sup>3</sup> | Comment     |
|------------|------------------------------|-----------------------------|-------------|------|------------------------------------|-------------------------------------------------|-------------------------------|-------------|
| 1          | pVEC                         | AC                          | 1.318       | 17   | High CPP                           | -                                               | 2                             | Unspecified |
|            |                              |                             |             | 25   | CPP                                | ≥ penetratin                                    | 1 and 2                       | Unsure      |
|            |                              |                             |             | 27   | CPP                                | > (KFF) <sub>3</sub> K and penetratin           | Not available                 | -           |
|            |                              |                             |             | 53   | CPP                                | ≥ MAP, > penetratin                             | Not available                 | -           |
|            |                              |                             |             | 66   | CPP                                | = YTA2, > Tat 48-60, transportan 10, penetratin | 1 and 2                       | Unspecified |
| 2          | Tat 48-60                    | C                           | 0.221       | 17   | Medium CPP                         | -                                               | 2                             | Unspecified |
|            |                              |                             |             | 26   | CPP                                | < penetratin, APH (85-98), nicastrin (38-53)    | 2a                            | -           |
|            |                              |                             |             | 34   | CPP                                | = transportan 10, < penetratin < R11            | 2b                            | -           |
|            |                              |                             |             | 38   | CPP                                | > VP22, < HIV Rev (34-50) and penetratin        | 2a                            | -           |
|            |                              |                             |             | 66   | CPP                                | = transportan 10, > Tat 48-60, < pVEC and YTA2  | 1 and 2                       | Unspecified |
| 3          | APH-1 (85-98)                | AU (AC)                     | 0.188       | 26   | CPP                                | > Tat 48-60, < penetratin and nicastrin (38-53) | 2a                            | -           |
| 4          | APH-1 (236-246)              | AU (AC)                     | 0.039       | 26   | No CPP                             | -                                               | Not applicable                | -           |
| 5          | Nicastrin (38-53)            | AU (AC)                     | 0.345       | 26   | CPP                                | > Tat 48-60, < penetratin and APH (85-98)       | 2a                            | -           |
| 6          | Nicastrin (414-434)          | AU (C)                      | 0.016       | 26   | No CPP                             | -                                               | Not applicable                | -           |
| 7          | Nicastrin (616-635)          | AU (AC)                     | 0.031       | 26   | No CPP                             | -                                               | Not applicable                | -           |
| 8          | Presenilin-1 (97-109)        | AU (AC)                     | 0.008       | 26   | No CPP                             | -                                               | Not applicable                | -           |
| 9          | Presenilin-1 (305-317)       | AU (AC)                     | 0.016       | 26   | No CPP                             | -                                               | Not applicable                | -           |
| 10         | D-pVEC                       | AC                          | 0.824       | 7    | CPP                                | ≈ pVEC                                          | 2b > 2a                       | -           |
|            |                              |                             |             | 27   | CPP                                | ≥ pVEC                                          | Not available                 | -           |
|            |                              |                             |             | 53   | CPP                                | ≥ pVEC                                          | Not available                 | -           |
| 11         | (KFF) <sub>3</sub> K         | AU (AC)                     | 1.837       | 27   | CPP                                | Less efficient than pVEC because of degradation | Not available                 | -           |
| 12         | Transportan                  | AC                          | (4.357)     | 17   | High CPP                           | -                                               | 2                             | Unspecified |
|            |                              |                             |             | 28   | CPP                                | > transportan 10                                | Not available                 | -           |
|            |                              |                             |             | 68   | CPP                                | -                                               | 1                             | Unspecified |
| 13         | Transportan 10               | AC                          | 1.641       | 28   | CPP                                | < transportan                                   | Not available                 | -           |
|            |                              |                             |             | 30   | CPP                                | > penetratin >> Tat 47-57                       | Not available                 | -           |
|            |                              |                             |             | 32   | CPP                                | < M918                                          | 2a and 2b                     | -           |
|            |                              |                             |             | 34   | CPP                                | = Tat 48-60, < penetratin < R11                 | Not available                 | -           |
|            |                              |                             |             | 66   | CPP                                | = penetratin, > Tat 48-60, < pVEC and YTA2      | 1 and 2                       | Unspecified |
| 14         | MAP                          | AC                          | 1.716       | 13   | CPP                                | -                                               | 1 and 2                       | -           |
|            |                              |                             |             | 17   | High CPP                           | -                                               | 2                             | Unspecified |
|            |                              |                             |             | 29   | CPP                                | -                                               | 1 and 2                       | Unspecified |
|            |                              |                             |             | 37   | CPP                                | -                                               | 1 and 2                       | Unsure      |
|            |                              |                             |             | 53   | CPP                                | ≥ pVEC, > penetratin                            | Not available                 | -           |
| 15         | Syn B1                       | AC                          | 0.063       | 17   | Medium CPP                         | -                                               | 2                             | Unspecified |
|            |                              |                             |             | 39   | CPP                                | -                                               | 2c                            | -           |
| 16         | Polyomavirus Vp <sub>1</sub> | AU (C)                      | 0.028       | 17   | Low CPP                            | Nearly unmeasurable uptake                      | 2                             | Unspecified |
| 17         | Bac1-15                      | AU (C)                      | 0.035       | 17   | Medium CPP                         | -                                               | 2                             | Unspecified |
| 18         | NF-κB                        | C                           | 0.025       | 17   | Low CPP                            | Nearly unmeasurable uptake                      | 2                             | Unspecified |
| 19         | SV40-T antigen               | C                           | 0.028       | 17   | Low CPP                            | Nearly unmeasurable uptake                      | 2                             | Unspecified |
| 20         | HATF <sub>3</sub>            | C                           | 0.023       | 17   | Low CPP                            | Nearly unmeasurable uptake                      | 2                             | Unspecified |
| 21         | hCT(9-32)                    | A                           | 0.024       | 17   | Low CPP                            | Nearly unmeasurable uptake                      | 2                             | Unspecified |
| 22         | HIV-1 Rev (34-50)            | C                           | 1.460       | 17   | High CPP                           | -                                               | 2                             | Unspecified |
|            |                              |                             |             | 38   | CPP                                | > penetratin > Tat 48-60 > VP22                 | 2a                            | -           |
|            |                              |                             |             | 56   | CPP                                | -                                               | Not available                 | -           |
| 23         | Integrin                     | H                           | 0.549       | 17   | Medium CPP                         | -                                               | 2                             | Unspecified |
| 24         | DPV6                         | C                           | 0.073       | 17   | Medium CPP                         | -                                               | 2                             | Unspecified |
| 25         | S <sub>413</sub> PV          | AC                          | 0.781       | 17   | High CPP                           | -                                               | 2                             | Unspecified |
| 26         | Pep-1                        | AC                          | 0.105       | 17   | Medium CPP                         | -                                               | 2                             | Unspecified |
| 27         | MPG                          | AC                          | 1.065       | 17   | Medium CPP                         | -                                               | 2                             | Unspecified |

|    |                       |         |         |    |            |                                                      |               |                                     |
|----|-----------------------|---------|---------|----|------------|------------------------------------------------------|---------------|-------------------------------------|
| 28 | Poly-P (SAP)          | AC      | 0.027   | 17 | Low CPP    | Nearly unmeasurable uptake                           | 2             | Unspecified                         |
| 29 | R7                    | C       | 0.395   | 12 | CPP        | > R6, < R8-9                                         | 3             | -                                   |
|    |                       |         |         | 16 | CPP        | > R6, < R8-9                                         | Not available | -                                   |
|    |                       |         |         | 17 | High CPP   | -                                                    | 2             | Unspecified                         |
|    |                       |         |         | 36 | CPP        | < R7W                                                | 1 and 2       | Unspecified, 2 = dominant mechanism |
| 30 | R9                    | C       | 1.000   | 17 | High CPP   | -                                                    | 2             | Unspecified                         |
|    |                       |         |         | 31 | CPP        | -                                                    | Not available | -                                   |
|    |                       |         |         | 33 | CPP        | -                                                    | 2             | Unspecified                         |
|    |                       |         |         | 35 | High CPP   | One of the most efficient known CPPs                 | 1 and 2       | Unspecified                         |
|    |                       |         |         | 41 | High CPP   | Rapid                                                | 1e and 2      | Unspecified                         |
|    |                       |         |         | 42 | CPP        | -                                                    | 1e, 2a and 2b | -                                   |
|    |                       |         |         | 43 | CPP        | -                                                    | 1 < 2         | Unspecified                         |
|    |                       |         |         | 47 | CPP        | -                                                    | Not available | -                                   |
| 31 | pVEC scrambled        | AU      | 0.101   | 7  | Low CPP    | << pVEC, not efficient                               | 2b > 2a       | -                                   |
|    |                       |         |         | 17 | Medium CPP | -                                                    | 2             | Unspecified                         |
| 32 | Tat 47-57             | C       | 0.309   | 30 | CPP        | << penetratin < transportan 10                       | 1 and 2       | Unspecified                         |
|    |                       |         |         | 33 | CPP        | -                                                    | 2             | Unspecified                         |
|    |                       |         |         | 42 | CPP        | -                                                    | 1e, 2a and 2b | -                                   |
|    |                       |         |         | 58 | CPP        | > K-FGF and PreS2-TLM                                | Not available | -                                   |
| 33 | Tat 48-59             | C       | 0.192   | 31 | CPP        | < penetratin < R9                                    | Not available | -                                   |
|    |                       |         |         | 63 | CPP        | -                                                    | Not available | -                                   |
| 34 | M918                  | AC      | (7.158) | 32 | High CPP   | Excellent novel CPP, > penetratin and transportan 10 | 2a            | -                                   |
| 35 | Penetratin            | C       | 1.000   | 17 | High CPP   | -                                                    | 2             | Unspecified                         |
|    |                       |         |         | 29 | CPP        | -                                                    | 2             | Unspecified                         |
|    |                       |         |         | 32 | CPP        | -                                                    | 2a and 2b     | -                                   |
|    |                       |         |         | 33 | CPP        | -                                                    | 2             | Unspecified                         |
|    |                       |         |         | 39 | CPP        | -                                                    | 2c            | -                                   |
|    |                       |         |         | 42 | CPP        | -                                                    | 1e, 2a and 2b | -                                   |
|    |                       |         |         | 44 | CPP        | -                                                    | 1 and 2       | Unspecified                         |
|    |                       |         |         | 60 | CPP        | -                                                    | 2a            | -                                   |
| 64 | CPP                   | -       | 2b      | -  |            |                                                      |               |                                     |
| 36 | R11                   | C       | 0.211   | 34 | CPP        | > penetratin > Tat 48-60, transportan 10             | Not available | -                                   |
| 37 | RL9                   | AC      | 0.134   | 35 | Low CPP    | Poor                                                 | 1 and 2       | Unspecified                         |
| 38 | RW9                   | AC      | 1.301   | 35 | High CPP   | One of the most efficient known CPPs                 | 1 and 2       | Unspecified                         |
| 39 | R7W                   | C       | 1.687   | 36 | CPP        | Efficient                                            | 1 and 2       | Unspecified, 2 = dominant           |
| 40 | VP22                  | AU (C)  | 0.161   | 38 | CPP        | < Tat 48-60 < penetratin < HIV Rev (34-50)           | 2a            | -                                   |
| 41 | D-Syn B1              | AC      | 0.089   | 39 | CPP        | -                                                    | 2c            | -                                   |
| 42 | Syn B3                | AU (C)  | 0.126   | 39 | CPP        | -                                                    | 2c            | -                                   |
| 43 | D-Syn B3              | AU (C)  | 0.185   | 39 | CPP        | -                                                    | 2c            | -                                   |
| 44 | Syn B5                | AU (AC) | 1.159   | 39 | CPP        | -                                                    | 2c            | -                                   |
| 45 | ARF (1-22)            | AC      | 1.641   | 40 | High CPP   | ≈ transportan 10                                     | 2b            | -                                   |
| 46 | ARF (1-22) scrambled  | AU      | 1.296   | 40 | High CPP   | ≈ transportan 10                                     | 2b            | -                                   |
| 47 | ARF (2-14)            | AC      | 0.950   | 40 | High CPP   | ≈ transportan 10                                     | Not available | -                                   |
| 48 | ARF (2-14) scrambled  | AU      | 0.173   | 40 | Low CPP    | -                                                    | Not available | -                                   |
| 49 | ARF (19-31)           | AC      | 1.382   | 40 | High CPP   | ≈ transportan 10                                     | Not available | -                                   |
| 50 | ARF (19-31) scrambled | AU      | 0.259   | 40 | Low CPP    | -                                                    | Not available | -                                   |
| 51 | hLF                   | AC      | 0.952   | 41 | High CPP   | Rapid                                                | 1e and 2      | 2 unspecified                       |
| 52 | MAP (II)              | AC      | 0.181   | 13 | CPP        | -                                                    | 1 and 2       | Unspecified                         |
| 53 | MAP (III)             | AC      | 0.115   | 13 | CPP        | ≈ MAP                                                | 1 and 2       | Unspecified                         |
| 54 | MAP (VII)             | AC      | 0.022   | 13 | Low CPP    | Slow                                                 | 1 and 2       | Unspecified                         |
| 55 | MAP (VIII)            | A       | 0.243   | 13 | CPP        | > MAP                                                | 1 and 2       | Unspecified                         |
| 56 | MAP (XI)              | AC      | 0.177   | 13 | CPP        | ≈ MAP                                                | 1 and 2       | Unspecified                         |
| 57 | MAP (XIII)            | A       | 0.052   | 13 | CPP        | ≈ MAP                                                | 1 and 2       | Unspecified                         |
| 58 | MAP (XV)              | AC      | 0.104   | 13 | CPP        | ≈ MAP                                                | 1 and 2       | Unspecified                         |
| 59 | KLA 1                 | AC      | 0.085   | 13 | CPP        | -                                                    | 1 and 2       | Unspecified                         |
| 60 | KLA 2                 | AC      | 0.008   | 13 | Low CPP    | Slow                                                 | 1 and 2       | Unspecified                         |
| 61 | KLA 11                | AC      | 0.025   | 13 | Low CPP    | Slow                                                 | 1 and 2       | Unspecified                         |
| 62 | KLA 5                 | AC      | 0.036   | 13 | Low CPP    | Slow                                                 | 1 and 2       | Unspecified                         |
| 63 | KLA 12                | AC      | 0.079   | 13 | CPP        | -                                                    | 1 and 2       | Unspecified                         |
| 64 | KLA 13                | AC      | 0.008   | 13 | Low CPP    | Slow                                                 | 1 and 2       | Unspecified                         |
| 65 | KLA 14                | AC      | 0.015   | 13 | Low CPP    | Slow                                                 | 1 and 2       | Unspecified                         |
| 66 | KLA 9                 | AC      | 0.023   | 13 | Low CPP    | Slow                                                 | 1 and 2       | Unspecified                         |
| 67 | KLA 10                | AC      | 0.115   | 13 | CPP        | -                                                    | 1 and 2       | Unspecified                         |
| 68 | KLA 15                | AC      | 0.120   | 13 | CPP        | -                                                    | 1 and 2       | Unspecified                         |
| 69 | KLA 8                 | AC      | 0.181   | 13 | CPP        | -                                                    | 1 and 2       | Unspecified                         |
| 70 | TP10-1                | AC      | 1.223   | 11 | CPP        | < transportan 10                                     | 1d            | -                                   |
| 71 | TP10-2                | AC      | 0.749   | 11 | CPP        | < transportan 10                                     | 1d            | -                                   |
| 72 | TP10-3                | AC      | 1.243   | 11 | CPP        | < transportan 10                                     | 1d            | -                                   |

|     |                                                |        |           |    |               |                                                                                             |                |             |
|-----|------------------------------------------------|--------|-----------|----|---------------|---------------------------------------------------------------------------------------------|----------------|-------------|
| 73  | TP10-4                                         | AC     | 1.263     | 11 | CPP           | < transportan 10                                                                            | 1d             | -           |
| 74  | TP10-5                                         | AC     | 2.141     | 11 | CPP           | > transportan 10                                                                            | 1d             | -           |
| 75  | D-R9                                           | C      | 1.389     | 12 | CPP           | Effective, (> (D-)R6-8)                                                                     | 3              | -           |
|     |                                                |        |           | 43 | CPP           | < R9                                                                                        | 1 > 2          | Unspecified |
| 76  | MP                                             | AC     | 0.570     | 45 | Low CPP       | Low efficient                                                                               | 1              | Unspecified |
| 77  | iMP                                            | AC     | (3.602)   | 45 | High CPP      | Highly efficient, (> MitP, penetratin)                                                      | 1              | Unspecified |
| 78  | rMP                                            | AC     | 0.352     | 45 | Low CPP       | Low efficient                                                                               | Not applicable | -           |
| 79  | riMP                                           | AC     | 0.288     | 45 | Low CPP       | Low efficient                                                                               | Not applicable | -           |
| 80  | MitP                                           | AC     | 2.712     | 45 | Medium CPP    | Efficient                                                                                   | 1              | Unspecified |
|     |                                                |        |           | 46 | CPP           | -                                                                                           | Not available  | -           |
| 81  | iMitP                                          | AC     | 2.272     | 45 | CPP           | Strong propensity for cell penetration                                                      | Not available  | -           |
| 82  | rMitP                                          | AC     | 0.531     | 45 | Low CPP       | Low efficient                                                                               | Not available  | -           |
| 83  | riMitP                                         | AC     | 0.837     | 45 | Low CPP       | Low efficient                                                                               | Not available  | -           |
| 84  | Cyt c <sup>77-101</sup>                        | AU (C) | 0.179     | 46 | High CPP      | Extremely/very efficient                                                                    | Not available  | -           |
| 85  | Cyt c <sup>86-101</sup>                        | AU (C) | 0.006     | 46 | CPP           | -                                                                                           | Not available  | -           |
| 86  | Cyt c <sup>79-92</sup>                         | AU (C) | 0.013     | 46 | Not available | -                                                                                           | Not available  | -           |
| 87  | Cyt c <sup>79-88</sup>                         | AU (C) | 0.006     | 46 | Not available | -                                                                                           | Not available  | -           |
| 88  | Cyt c <sup>4-13</sup>                          | AU (C) | 0.013     | 46 | Not available | -                                                                                           | Not available  | -           |
| 89  | Cyt c <sup>5-13</sup>                          | AU (C) | 0.069     | 46 | Not available | -                                                                                           | Not available  | -           |
| 90  | MTS                                            | H      | 0.315     | 48 | CPP           | -                                                                                           | Not available  | -           |
| 91  | P14LRR                                         | AC     | (7.958)   | 49 | High CPP      | Highly efficient class of CPPs                                                              | 1              | Unspecified |
| 92  | P11LRR                                         | AC     | 1.623     | 49 | High CPP      | Highly efficient class of CPPs                                                              | 1 and 2        | Unspecified |
|     |                                                |        |           | 50 | CPP           | -                                                                                           | 1 and 2        | Unspecified |
| 93  | (P10LRR-Gly) <sub>2</sub> -C5                  | AC     | (84.034)  | 50 | CPP           | Uptake far superior to P11LRR and Tat 47-57                                                 | 1 and 2        | Unspecified |
| 94  | (P10LRR-β-Ala) <sub>2</sub> -C5                | AC     | (66.648)  | 50 | CPP           | Uptake far superior to P11LRR and Tat 47-57                                                 | 1 and 2        | Unspecified |
| 95  | (P10LRR-ABUA) <sub>2</sub> -C5                 | AC     | (73.892)  | 50 | CPP           | Uptake far superior to P11LRR and Tat 47-57                                                 | 1 and 2        | Unspecified |
| 96  | VPTLK                                          | CH     | 0.002     | 51 | CPP           | -                                                                                           | Unknown        | -           |
| 97  | MAP(Aib)                                       | AC     | (125.240) | 52 | High CPP      | -                                                                                           | Not available  | -           |
| 98  | sC18                                           | AC     | 0.166     | 54 | High CPP      | Highly efficient                                                                            | 1 and 2        | Unspecified |
|     |                                                |        |           | 54 | CPP           | -                                                                                           | 2              | Unspecified |
| 99  | hCT(18-32)-k7                                  | AU     | 0.183     | 57 | Medium CPP    | Effective                                                                                   | Not available  | -           |
|     |                                                |        |           | 54 | CPP           | Faster and efficient than hCT(18-32)-k7                                                     | Unclear        | -           |
| 101 | N-E5L-sC18                                     | AC     | 0.150     | 54 | CPP           | Faster and efficient than sC18                                                              | Unclear        | -           |
| 102 | N-E5L-Tat 48-60                                | AU (C) | 0.507     | 54 | CPP           | Faster and efficient than Tat 48-60                                                         | Unclear        | -           |
| 103 | FHV coat (35-49)                               | C      | (4.127)   | 56 | High CPP      | High efficient CPP and superior cellular uptake >Tat 48-60                                  | 2a             | -           |
| 104 | PasTat                                         | C      | (4.426)   | 55 | CPP           | -                                                                                           | Not available  | -           |
| 105 | BMV Gag (7-25)                                 | C      | 0.288     | 56 | CPP           | -                                                                                           | Not available  | -           |
| 106 | HTLV-II Rex (4-16)                             | C      | 0.288     | 56 | CPP           | -                                                                                           | Not available  | -           |
| 107 | Human cJun (252-279)                           | C      | 2.744     | 56 | CPP           | -                                                                                           | Not available  | -           |
| 108 | Human cFos (139-164)                           | C      | 0.199     | 56 | CPP           | -                                                                                           | Not available  | -           |
| 109 | K-FGF (Kaposi fibroblast growth factor)        | H      | 0.200     | 58 | CPP           | < arginine-rich peptides: Tat 47-57, penetratin and PTD4                                    | Not available  | -           |
| 110 | PreS2-TLM (PreS2-derived translocatory motif)  | A      | 0.224     | 58 | CPP           | < arginine-rich peptides: Tat 47-57, penetratin and PTD4                                    | Not available  | -           |
| 111 | PTD4 (Protein transduction domain 4)           | C      | 0.658     | 58 | CPP           | > peptides: K-FGF and PreS2-TLM                                                             | Not available  | -           |
| 112 | α-peptide/β-peptoid chimera 2                  | AU     | 0.185     | 59 | Medium CPP    | Possesses efficient cellular uptake properties superior to well-described CPPs, ≈ Tat 47-57 | 1 and 2        | Unspecified |
| 113 | α-peptide/β-peptoid chimera 6                  | AU     | 2.040     | 59 | High CPP      | Possesses efficient cellular uptake properties superior to well-described CPPs, > Tat 47-57 | 1 and 2        | Unspecified |
| 114 | α-peptide/β-peptoid chimera 8                  | AU     | 2.102     | 59 | High CPP      | Possesses efficient cellular uptake properties superior to well-described CPPs, > Tat 47-57 | 1 and 2        | Unspecified |
| 115 | hArg <sub>8</sub> (Homoarginine <sub>8</sub> ) | C      | 0.464     | 59 | Medium CPP    | Possesses efficient cellular uptake properties superior to well-described CPPs, ≈           | 1 and 2        | Unspecified |

|     |                                                                           |         |         |    |            |                                                       |                |             |
|-----|---------------------------------------------------------------------------|---------|---------|----|------------|-------------------------------------------------------|----------------|-------------|
| 116 | PenArg                                                                    | C       | 1.810   | 60 | CPP        | Tat 47-57<br>> penetratin > PenLys                    | 2a             | -           |
| 117 | PenLys                                                                    | C       | 0.041   | 60 | CPP        | < penetratin < PenArg                                 | 2a             | -           |
| 118 | aca-[Lys(Nys <sup>+</sup> )-aca] <sub>4</sub> -<br>Lys(Nys <sup>+</sup> ) | AU      | 0.001   | 61 | No CPP     | -                                                     | Not applicable | -           |
| 119 | aca-[Lys(Nys <sup>+</sup> )-aca] <sub>6</sub> -<br>Lys(Nys <sup>+</sup> ) | AU      | 0.005   | 61 | Low CPP    | -                                                     | Not available  | -           |
| 120 | M511                                                                      | AU (AC) | 0.599   | 62 | CPP        | -                                                     | Not available  | -           |
| 121 | M551                                                                      | AU (C)  | 0.240   | 62 | CPP        | -                                                     | Not available  | -           |
| 122 | G53-1                                                                     | AU (AC) | 0.150   | 62 | Low CPP    | -                                                     | Not available  | -           |
| 123 | G53-2                                                                     | AU (AC) | 0.839   | 62 | CPP        | -                                                     | Not available  | -           |
| 124 | <i>Kno ref. 61<br/>(Knotted-1<br/>homeodomain third<br/>helix)</i>        | C       | (7.358) | 63 | CPP        | -                                                     | Not available  | -           |
| 125 | R6/W3                                                                     | AC      | 0.910   | 63 | CPP        | -                                                     | Not available  | -           |
| 126 | Phe <sup>6-14</sup> -penetratin                                           | AU (C)  | 0.727   | 64 | CPP        | < penetratin                                          | 2b             | -           |
| 127 | Dodeca-penetratin                                                         | AU (AC) | 1.154   | 64 | CPP        | ≈ penetratin                                          | 2b             | -           |
| 128 | MG2d (Magainin 2<br>analogue)                                             | AC      | 0.798   | 65 | CPP        | -                                                     | 1b             | -           |
| 129 | BF2d (Buforin 2<br>analogue)                                              | AC      | 0.953   | 65 | CPP        | -                                                     | Not available  | -           |
| 130 | YTA2                                                                      | AC      | 1.545   | 66 | CPP        | = pVEC, > Tat 48-60,<br>transportan 10,<br>penetratin | 1 and 2        | Unspecified |
| 131 | K9                                                                        | C       | 0.119   | 12 | Low CPP    | Not effective                                         | Not available  | -           |
| 132 | H9                                                                        | C       | 0.068   | 12 | Low CPP    | Not effective                                         | Not available  | -           |
| 133 | O9                                                                        | C       | 0.068   | 12 | Low CPP    | Not effective                                         | Not available  | -           |
| 134 | R8                                                                        | C       | 0.639   | 12 | Medium CPP | Effective CPP (> R6-7,<br>< R9)                       | 3              | -           |
|     |                                                                           |         |         | 16 | CPP        | >R6-7, < R9                                           | Not available  | -           |
| 135 | R6                                                                        | C       | 0.194   | 12 | Medium CPP | Effective CPP, < R7-9                                 | 3              | -           |
|     |                                                                           |         |         | 16 | CPP        | < R7-9                                                | Not available  | -           |
| 136 | R5                                                                        | C       | 0.077   | 12 | Low CPP    | Not effective CPP                                     | Not available  | -           |
|     |                                                                           |         |         | 16 | No CPP     | -                                                     | Not applicable | -           |
| 137 | R4                                                                        | C       | 0.074   | 12 | Low CPP    | Not effective CPP                                     | Not available  | -           |
| 138 | R3                                                                        | C       | 0.055   | 12 | Low CPP    | Not effective CPP                                     | Not available  | -           |
| 139 | D-R8                                                                      | C       | 1.577   | 12 | Medium CPP | Effective CPP, > (D-)<br>R6-7, < (D-) R9              | 3              | -           |
| 140 | D-R7                                                                      | C       | 1.071   | 12 | Medium CPP | Effective CPP, > (D-)<br>R6, < (D-) R8-9              | 3              | -           |
| 141 | D-R6                                                                      | C       | 0.323   | 12 | Medium CPP | Effective CPP, < (D-)<br>R7-9                         | 3              | -           |
| 142 | D-R5                                                                      | C       | 0.115   | 12 | Low CPP    | Not effective CPP                                     | Not available  | -           |
| 143 | D-R4                                                                      | C       | 0.098   | 12 | Low CPP    | Not effective CPP                                     | Not available  | -           |
| 144 | R15                                                                       | C       | 1.345   | 12 | Medium CPP | Effective CPP, > R6-9,<br>but toxic                   | 3              | -           |
| 145 | R20                                                                       | C       | 0.764   | 12 | Medium CPP | Effective CPP, < R9,<br>R15, but toxic                | 3              | -           |
| 146 | R25                                                                       | C       | 0.400   | 12 | Low CPP    | Not effective CPP, < R7,<br>R9, R15, but toxic        | Not available  | -           |
| 147 | R30                                                                       | C       | 0.109   | 12 | Low CPP    | Not effective CPP                                     | Not available  | -           |
| 148 | [Ala <sub>1</sub> ]pVEC                                                   | AC      | 0.304   | 7  | CPP        | Significant < pVEC                                    | 2b > 2a        | -           |
| 149 | [Ala <sub>2</sub> ]pVEC                                                   | AC      | 0.507   | 7  | CPP        | Significant < pVEC                                    | 2b > 2a        | -           |
| 150 | [Ala <sub>3</sub> ]pVEC                                                   | AC      | 0.406   | 7  | CPP        | Significant < pVEC                                    | 2b > 2a        | -           |
| 151 | [Ala <sub>4</sub> ]pVEC                                                   | AC      | 0.659   | 7  | CPP        | Significant < pVEC                                    | 2b > 2a        | -           |
| 152 | [Ala <sub>5</sub> ]pVEC                                                   | AC      | 0.456   | 7  | CPP        | Significant < pVEC                                    | 2b > 2a        | -           |
| 153 | [Ala <sub>6</sub> ]pVEC                                                   | AC      | 2.433   | 7  | CPP        | Significant > pVEC                                    | 2b > 2a        | -           |
| 154 | [Ala <sub>7</sub> ]pVEC                                                   | AC      | 1.115   | 7  | CPP        | ≈ pVEC                                                | 2b > 2a        | -           |
| 155 | [Ala <sub>8</sub> ]pVEC                                                   | AC      | 2.129   | 7  | CPP        | Significant > pVEC                                    | 2b > 2a        | -           |
| 156 | [Ala <sub>9</sub> ]pVEC                                                   | AC      | 0.760   | 7  | CPP        | Significant > pVEC                                    | 2b > 2a        | -           |
| 157 | [Ala <sub>10</sub> ]pVEC                                                  | AC      | 1.470   | 7  | CPP        | ≈ pVEC                                                | 2b > 2a        | -           |
| 158 | [Ala <sub>11</sub> ]pVEC                                                  | AC      | 1.774   | 7  | CPP        | ≈ pVEC                                                | 2b > 2a        | -           |
| 159 | [Ala <sub>12</sub> ]pVEC                                                  | AC      | 1.420   | 7  | CPP        | ≈ pVEC                                                | 2b > 2a        | -           |
| 160 | [D-Ala <sub>13</sub> ]pVEC                                                | AC      | 1.825   | 7  | CPP        | ≈ pVEC                                                | 2b > 2a        | -           |
| 161 | [Ala <sub>14</sub> ]pVEC                                                  | AC      | 0.558   | 7  | CPP        | Significant > pVEC                                    | 2b > 2a        | -           |
| 162 | [D-Ala <sub>15</sub> ]pVEC                                                | AC      | 1.115   | 7  | CPP        | ≈ pVEC                                                | 2b > 2a        | -           |
| 163 | [Ala <sub>16</sub> ]pVEC                                                  | AC      | 1.521   | 7  | CPP        | ≈ pVEC                                                | 2b > 2a        | -           |
| 164 | [Ala <sub>17</sub> ]pVEC                                                  | AC      | 2.129   | 7  | CPP        | Significant > pVEC                                    | 2b > 2a        | -           |
| 165 | [Ala <sub>18</sub> ]pVEC                                                  | AC      | 2.079   | 7  | CPP        | ≈ pVEC                                                | 2b > 2a        | -           |
| 166 | retro-pVEC                                                                | AC      | 0.406   | 7  | CPP        | Significant > pVEC                                    | 2b > 2a        | -           |
| 167 | Ap1                                                                       | C       | 0.289   | 9  | Low CPP    | < penetratin                                          | Unclear        | -           |
| 168 | Ap2                                                                       | C       | 1.333   | 9  | CPP        | > penetratin                                          | Unclear        | -           |
| 169 | Ap3                                                                       | C       | 0.111   | 9  | Low CPP    | < penetratin                                          | Unclear        | -           |
| 170 | Ap4                                                                       | C       | 0.511   | 9  | Low CPP    | < penetratin                                          | Unclear        | -           |
| 171 | Ap5                                                                       | C       | 0.244   | 9  | Low CPP    | < penetratin                                          | Unclear        | -           |
| 172 | Ap6                                                                       | C       | 0.222   | 9  | Low CPP    | < penetratin                                          | Unclear        | -           |
| 173 | Ap7                                                                       | C       | 0.089   | 9  | Low CPP    | < penetratin                                          | Unclear        | -           |
| 174 | Ap8                                                                       | C       | 0.778   | 9  | CPP        | ≈ penetratin                                          | Unclear        | -           |
| 175 | Ap9                                                                       | C       | 0.978   | 9  | CPP        | ≈ penetratin                                          | Unclear        | -           |
| 176 | Ap10                                                                      | AC      | 0.400   | 9  | Low CPP    | < penetratin                                          | Unclear        | -           |

|     |                                                                    |          |                 |           |                 |                               |                      |          |
|-----|--------------------------------------------------------------------|----------|-----------------|-----------|-----------------|-------------------------------|----------------------|----------|
| 177 | Ap11                                                               | C        | 0.242           | 9         | Low CPP         | < penetratin                  | Unclear              | -        |
| 178 | Ap12                                                               | C        | 0.644           | 9         | CPP             | < penetratin                  | Unclear              | -        |
| 179 | Ap13                                                               | C        | 0.378           | 9         | Low CPP         | < penetratin                  | Unclear              | -        |
| 180 | Ap14                                                               | C        | 0.356           | 9         | Low CPP         | < penetratin                  | Unclear              | -        |
| 181 | Ap15                                                               | C        | 0.411           | 9         | Low CPP         | < penetratin                  | Unclear              | -        |
| 182 | Ap16                                                               | C        | 0.444           | 9         | Low CPP         | < penetratin                  | Unclear              | -        |
| 183 | SAP (E)                                                            | A        | 0.007           | 67        | Low CPP         | Not highly efficient          | 2b                   | -        |
| 184 | Eng<br>(Engrailed-2<br>homeodomain third<br>helix)                 | C        | 1.235           | 69        | CPP             | -                             | Not available        | -        |
| 185 | Hox<br>(HoxA-13<br>homeodomain third<br>helix)                     | C        | 0.500           | 69        | CPP             | -                             | Not available        | -        |
| 186 | <i>Kno ref. 67<br/>(Knotted-1<br/>homeodomain third<br/>helix)</i> | <i>C</i> | <i>(11.118)</i> | <i>69</i> | <i>High CPP</i> | <i>High uptake efficiency</i> | <i>Not available</i> | <i>-</i> |

Peptides whose unified response is an outlier are indicated in italic. Their unreliable CP-responses were not considered during data-evaluation.

<sup>1</sup>Chemical classes of CPPs: A = amphipathic, C = cationic, H = hydrophobic, AC = intersection amphipathic-cationic, CH = intersection cationic-hydrophobic and AU = author unclassified. If AU, the recommended chemical class, according to ref. 6, is indicated between brackets.

<sup>2</sup>Literature evaluation = how the authors of the study estimated the cellular influx capacity of the investigated peptides: no, low, medium or high CPP. CPP alone means not specified by the authors.

<sup>3</sup>1 = direct penetration with 1a = inverted micelles, 1b = pore formation, 1c = carpet like model, 1d = membrane thinning and 1e = uptake through nucleation zones; 2 = endocytosis with 2a = micropinocytosis, 2b = endocytosis dependent on coat proteins (clathrin, caveolae or lipid raft mediated) and 2c = endocytosis independent on coat proteins; 3 = energy-dependent mechanism, but not endocytosis [according to ref. 2,12,72,73]
