# Supplementary material for: Chemical-Functional Diversity in Cell-Penetrating Peptides
Source: PubMed Central journal article supplement (PMC3739727; doi:10.1371/journal.pone.0071752), 2013-08-09
Supplement: pone.0071752.s005.pdf [file pone.0071752.s005.pdf]

**Table S4. Summary of the PCA-analysis of the descriptors divided by the molecular weight, describing the eigenvalues of the covariance matrix, the total variance explained (cumulative R<sup>2</sup>) and the predictive ability (cumulative Q<sup>2</sup>).**

| Principal Component | Eigenvalue | Cumulative R <sup>2</sup> | Cumulative Q <sup>2</sup> |
|---------------------|------------|---------------------------|---------------------------|
| 1                   | 73.7       | 0.396                     | 0.371                     |
| 2                   | 41.8       | 0.621                     | 0.596                     |
| 3                   | 12.7       | 0.689                     | 0.655                     |
| 4                   | 8.28       | 0.734                     | 0.678                     |
| 5                   | 7.95       | 0.777                     | 0.715                     |
| 6                   | 6.27       | 0.810                     | 0.749                     |
| 7                   | 4.44       | 0.834                     | 0.771                     |
| 8                   | 3.18       | 0.851                     | 0.781                     |
| 9                   | 2.75       | 0.866                     | 0.792                     |
| 10                  | 2.53       | 0.880                     | 0.803                     |
| 11                  | 2.08       | 0.891                     | 0.807                     |
| 12                  | 1.62       | 0.900                     | 0.803                     |
| 13                  | 1.44       | 0.907                     | 0.807                     |
